# Supplementary material
Source: Springer Nature journal article supplement (https://www.springermedizin.de/resource/supplementary/13014_2013_844_MOESM2_ESM.pdf/9634262)

# EPIC QUALITY of LIFE

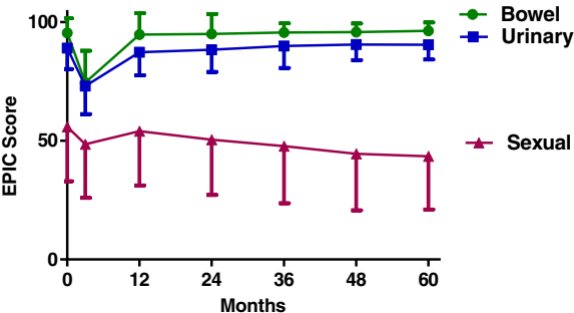

Supplement: MOESM2 [file 9634262]
